# Supplementary material
Source: Springer Nature journal article supplement (https://www.springermedizin.de/resource/supplementary/12936_2012_2234_MOESM4_ESM.pdf/9542674)

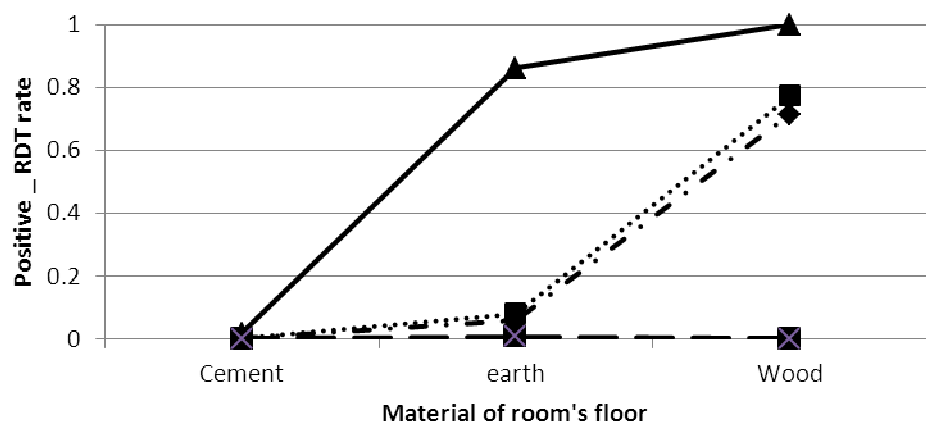

—◆— < 30 Minutes    ...■... 30 - 40 minutes  
—▲— 40 - 90 minutes    —x— > 90 minutes

Supplement: MOESM4 [file 9542674]
